# Supplementary material
Source: publisher site journal article supplement (https://edge.sagepub.com/sites/default/files/Appendix_5.pdf)

# Appendix 5

## Text Structures for Important Moments

### Valuable Advice

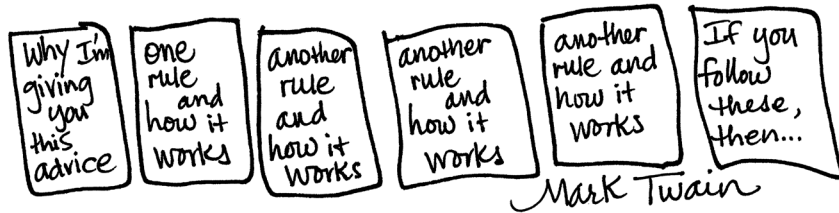

### Letter of Recommendation

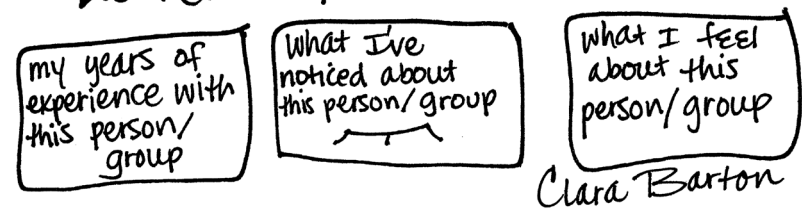

### Letter from Home

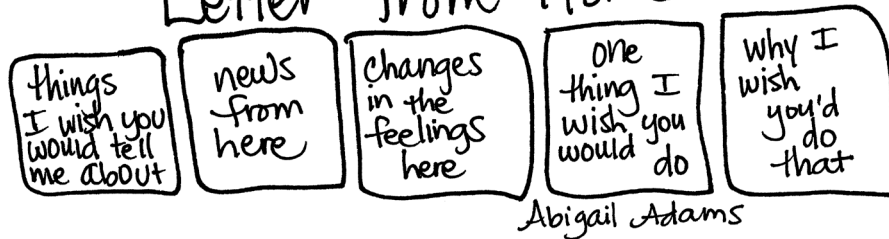

### No, Thank You

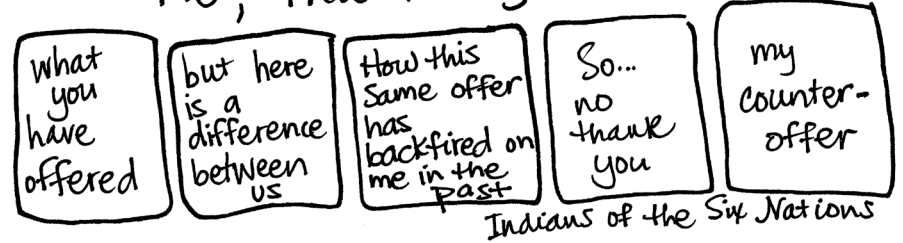

### Bon Voyage

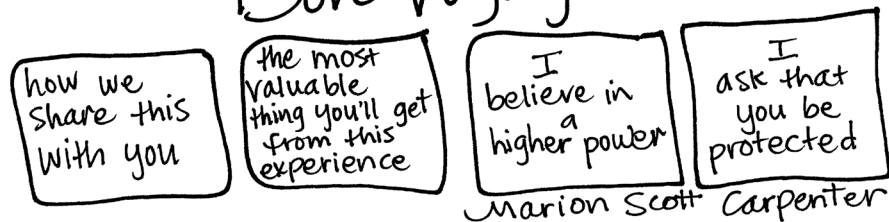

Supplement: Supplementary file 1 [file Appendix_5.pdf]
